# Supplementary material
Source: publisher figshare collection journal article supplement (https://diabetesjournals.figshare.com/articles/dataset/_/20085932)
Supplement: Supplementary file 1 [file 1]

## Supplement file

**Table S1. Clinical and biochemical variables associated with secondary endpoint of  $\geq 40\%$  fall from baseline eGFR with final eGFR  $< 30$  ml/min**

|                                     | Fall in eGFR $\geq 40\%$<br>(N=308) | Fall in eGFR less than 40%<br>(N=4953) | p value   |
|-------------------------------------|-------------------------------------|----------------------------------------|-----------|
| <b>Age (years)</b>                  | 44.5 (34.0, 58.0)                   | 34.0 (26.0, 45.0)                      | $< 0.001$ |
| <b>Duration of diabetes (years)</b> | 14.0 (5.0, 28.0)                    | 11.0 (2.0, 21.0)                       | $< 0.001$ |
| <b>Gender (%)</b>                   |                                     |                                        | 0.640     |
| FEMALE                              | 160 (51.9%)                         | 2505 (50.6%)                           |           |
| MALE                                | 148 (48.1%)                         | 2448 (49.4%)                           |           |
| <b>Ethnicity (%)</b>                |                                     |                                        | $< 0.001$ |
| African-Caribbean                   | 73 (23.7%)                          | 631 (12.7%)                            |           |
| Asian                               | 9 (2.9%)                            | 146 (2.9%)                             |           |
| Caucasian                           | 214 (69.5%)                         | 3877 (78.3%)                           |           |
| Other                               | 12 (3.9%)                           | 299 (6.0%)                             |           |
| <b>Retinopathy grade</b>            |                                     |                                        | $< 0.001$ |
| R0                                  | 67 (36%)                            | 1,777 (52%)                            |           |
| R1-R2-R3                            | 1652 (64%)                          | 421 (12.3%)                            |           |
| <b>Weight (kg)</b>                  | 69.8 (60.0, 83.6)                   | 71.3 (62.0, 82.2)                      | 0.482     |
| <b>BMI (kg/m<sup>2</sup>)</b>       | 25.0 (22.0, 29.0)                   | 24.3 (22.0, 27.4)                      | 0.004     |
| <b>ACR (mg/mmol)</b>                | 38.4 (10.9, 45.2)                   | 15.4 (5.5, 43.1)                       | $< 0.001$ |
| <b>Albuminuria status/grade</b>     |                                     |                                        | $< 0.001$ |

|                                 |                      |                      |         |
|---------------------------------|----------------------|----------------------|---------|
| A1                              | 24 (7.8%)            | 565 (11.4%)          |         |
| A2                              | 94 (30.5%)           | 2298 (46.4%)         |         |
| A3                              | 190 (61.7%)          | 2090 (42.2%)         |         |
| <b>eGFR (ml/min)</b>            | 67.5 (55.5, 86.6)    | 92.2 (74.4, 112.7)   | < 0.001 |
| <b>SBP (mmHg)</b>               | 128.0 (117.0, 140.0) | 122.0 (112.0, 132.0) | < 0.001 |
| <b>DBP (mmHg)</b>               | 75.0 (68.0, 81.0)    | 74.0 (68.0, 80.0)    | 0.077   |
| <b>HbA1c (mmol/mol)</b>         | 78.1 (59.6, 101.4)   | 68.0 (57.0, 85.8)    | < 0.001 |
| <b>Cholesterol (mmol/l)</b>     | 4.5 (3.8, 5.4)       | 4.6 (4.0, 5.2)       | 0.333   |
| <b>HDL-cholesterol (mmol/l)</b> | 1.5 (1.2, 1.8)       | 1.5 (1.3, 1.9)       | 0.225   |
| <b>LDL-cholesterol (mmol/l)</b> | 2.3 (1.8, 2.9)       | 2.4 (1.9, 3.0)       | 0.043   |
| <b>Triglycerides (mmol/l)</b>   | 1.3 (0.8, 2.0)       | 1.0 (0.7, 1.5)       | < 0.001 |

Data median interquartile range shown Abbreviations eGFR- estimated glomerular filtration rate, SBP- systolic blood pressure, DBP- diastolic blood pressure, BMI- body mass index, HDL- high density lipoprotein, LDL- low density lipoprotein , ACR- urine albumin creatinine ratio.

**Table S2. Clinical and biochemical variables associated with secondary endpoint of  $\geq 30\%$  fall from baseline eGFR with final eGFR  $< 30$  ml/min**

|                                     | Fall in eGFR $\geq 30\%$<br>(N=318) | Fall in eGFR less than 30%<br>(N=4943) | p value   |
|-------------------------------------|-------------------------------------|----------------------------------------|-----------|
| <b>Age (years)</b>                  | 45.0 (34.0, 58.0)                   | 34.0 (26.0, 45.0)                      | $< 0.001$ |
| <b>Duration of diabetes (years)</b> | 14.0 (5.0, 28.0)                    | 11.0 (2.0, 21.0)                       | $< 0.001$ |
| <b>Gender(%)</b>                    |                                     |                                        | 0.825     |
| FEMALE                              | 163 (51.3%)                         | 2502 (50.6%)                           |           |
| MALE                                | 155 (48.7%)                         | 2441 (49.4%)                           |           |
| <b>Ethnicity(%)</b>                 |                                     |                                        | $< 0.001$ |
| African-Caribbean                   | 75 (23.6%)                          | 629 (12.7%)                            |           |
| Asian                               | 10 (3.1%)                           | 145 (2.9%)                             |           |
| Caucasian                           | 221 (69.5%)                         | 3870 (78.3%)                           |           |
| Other                               | 12 (3.8%)                           | 299 (6.0%)                             |           |
| <b>Retinopathy (%)</b>              |                                     |                                        | $< 0.001$ |
| R0                                  | 68 (36%)                            | 1775 (52%)                             |           |
| R1-R2-R3                            | 119 (64%)                           | 1651 (48%)                             |           |
| <b>Weight (kg)</b>                  | 71.1 (60.1, 84.5)                   | 71.3 (62.0, 82.2)                      | 0.266     |
| <b>BMI (kg/m<sup>2</sup>)</b>       | 25.2 (22.4, 29.0)                   | 24.3 (22.0, 27.3)                      | 0.002     |
| <b>ACR (mg/mmol)</b>                | 38.4 (10.7, 46.0)                   | 15.3 (5.5, 43.0)                       | $< 0.001$ |
| <b>Albuminuria status</b>           |                                     |                                        | $< 0.001$ |
| A1                                  | 24 (7.5%)                           | 565 (11.4%)                            |           |
| A2                                  | 98 (30.8%)                          | 2294 (46.4%)                           |           |
| A3                                  | 196 (61.6%)                         | 2084 (42.2%)                           |           |

|                                 |                      |                      |            |
|---------------------------------|----------------------|----------------------|------------|
| <b>eGFR (ml/min)</b>            | 66.7 (55.1, 85.7)    | 92.2 (74.4, 112.8)   | <<br>0.001 |
| <b>SBP (mmHg)</b>               | 128.0 (118.0, 140.0) | 122.0 (112.0, 132.0) | <<br>0.001 |
| <b>DBP (mmHg)</b>               | 75.0 (68.0, 81.0)    | 74.0 (68.0, 80.0)    | 0.078      |
| <b>Hba1c (mmol/mol)</b>         | 77.0 (59.6, 100.8)   | 68.0 (57.0, 85.8)    | <<br>0.001 |
| <b>Cholesterol (mmol/l)</b>     | 4.5 (3.9, 5.4)       | 4.6 (4.0, 5.2)       | 0.325      |
| <b>HDL-cholesterol (mmol/l)</b> | 1.5 (1.2, 1.8)       | 1.5 (1.3, 1.9)       | 0.258      |
| <b>LDL-cholesterol (mmol/l)</b> | 2.3 (1.8, 2.9)       | 2.4 (1.9, 3.0)       | 0.069      |
| <b>Triglycerides (mmol/l)</b>   | 1.3 (0.8, 2.0)       | 1.0 (0.7, 1.5)       | <<br>0.001 |

Data median interquartile range shown Abbreviations eGFR- estimated glomerular filtration rate, SBP- systolic blood pressure, DBP- diastolic blood pressure, BMI- body mass index, HDL- high density lipoprotein, LDL- low density lipoprotein, ACR- urine albumin creatinine ratio.

**Table S3: Comparison of baseline clinical and biochemical characteristics in people with type 1 diabetes of African-Caribbean and non African-Caribbean ethnic origin**

|                                         | Non-African Caribbean<br>(N=4557) | African-Caribbean<br>(N=704) | p<br>value |
|-----------------------------------------|-----------------------------------|------------------------------|------------|
| <b>Age (years)</b>                      | 35.0 (26.0, 46.0)                 | 32.0 (20.0, 44.0)            | <<br>0.001 |
| <b>Duration of diabetes<br/>(years)</b> | 12.0 (3.0, 23.0)                  | 6.0 (1.0, 14.5)              | <<br>0.001 |
| <b>Gender (%)</b>                       |                                   |                              | 0.185      |
| FEMALE                                  | 2292 (50.3%)                      | 373 (53.0%)                  |            |
| MALE                                    | 2265 (49.7%)                      | 331 (47.0%)                  |            |
| <b>Ethnicity (%)</b>                    |                                   |                              | <<br>0.001 |
| African-Caribbean                       | 0 (0.0%)                          | 704 (100.0%)                 |            |
| Asian                                   | 155 (3.4%)                        | 0 (0.0%)                     |            |
| Caucasian                               | 4091 (89.8%)                      | 0 (0.0%)                     |            |
| Other                                   | 311 (6.8%)                        | 0 (0.0%)                     |            |
| <b>Retinopathy status</b>               |                                   |                              | <<br>0.001 |
| R0                                      | 2739 (87.9%)                      | 404 (81.3%)                  |            |
| R1-R2-R3                                | 378 (12.1%)                       | 93 (18.7%)                   |            |
| <b>Weight (kg)</b>                      | 71.6 (62.2, 82.4)                 | 68.8 (58.4, 81.4)            | <<br>0.001 |
| <b>BMI (kg/m<sup>2</sup>)</b>           | 24.4 (22.0, 27.4)                 | 24.0 (21.0, 28.0)            | 0.384      |
| <b>ACR (mg/mmol)</b>                    | 14.3 (5.5, 43.0)                  | 39.0 (8.2, 45.0)             | <<br>0.001 |
| <b>Albuminuria status</b>               |                                   |                              | <<br>0.001 |
| A1                                      | 532 (11.7%)                       | 57 (8.1%)                    |            |
| A2                                      | 2151 (47.2%)                      | 241 (34.2%)                  |            |
| A3                                      | 1874 (41.1%)                      | 406 (57.7%)                  |            |

|                                 |                      |                      |            |
|---------------------------------|----------------------|----------------------|------------|
|                                 |                      |                      |            |
| <b>eGFR (ml/min)</b>            | 91.2 (73.4, 111.1)   | 87.2 (66.5, 113.9)   | 0.322      |
| <b>SBP (mmHg)</b>               | 122.0 (113.0, 132.0) | 122.0 (112.0, 133.0) | 0.840      |
| <b>DBP (mmHg)</b>               | 74.0 (68.0, 80.0)    | 74.0 (67.0, 80.0)    | 0.653      |
| <b>HbA1c(mmol/mol)</b>          | 67.2 (56.3, 83.0)    | 83.0 (65.0, 106.1)   | <<br>0.001 |
| <b>Cholesterol (mmol/l)</b>     | 4.6 (4.0, 5.2)       | 4.5 (3.9, 5.2)       | 0.313      |
| <b>HDL-cholesterol (mmol/l)</b> | 1.6 (1.3, 1.9)       | 1.5 (1.2, 1.8)       | 0.081      |
| <b>LDL-cholesterol (mmol/l)</b> | 2.4 (1.9, 3.0)       | 2.5 (2.0, 3.0)       | 0.026      |
| <b>Triglycerides (mmol/l)</b>   | 1.0 (0.7, 1.5)       | 0.9 (0.7, 1.5)       | 0.014      |
| <b>IMD Decile</b>               | 3.00 (2.00, 5.00)    | 3.00 (2.00, 5.00)    | 0.885      |

Data median interquartile range shown Abbreviations eGFR- estimated glomerular filtration rate, SBP- systolic blood pressure, DBP- diastolic blood pressure, BMI- body mass index, HDL- high density lipoprotein, LDL- low density lipoprotein, IMD –index of multiple deprivation , ACR- urine albumin creatinine ratio.

**Table S4**

**Results of univariate, multivariate Cox regression models and competing risk analysis (with death as a competing event) for secondary endpoint of  $\geq 40\%$  fall from baseline eGFR with final eGFR  $< 30$  ml/min**

| Dependent: Survival         |                     | all          | HR (CPH univariable)           | HR (CPH multivariable)         | HR (Competing risks model)     |
|-----------------------------|---------------------|--------------|--------------------------------|--------------------------------|--------------------------------|
| Age_groups (years)          | 0-30                | 1958 (37.2)  | -                              | -                              | -                              |
|                             | 31-60               | 2886 (54.9)  | 1.97 (1.44-2.71, $p < 0.001$ ) | 2.45 (1.77-3.40, $p < 0.001$ ) | 2.40 (1.73-3.33, $p < 0.001$ ) |
|                             | 60+                 | 417 (7.9)    | 5.00 (3.48-7.19, $p < 0.001$ ) | 5.87 (3.94-8.73, $p < 0.001$ ) | 5.25 (3.49-7.91, $p < 0.001$ ) |
| African-Caribbean_Ethnicity | 1-other             | 4557 (86.6)  | -                              | -                              | -                              |
|                             | 2-african-caribbean | 704 (13.4)   | 2.08 (1.60-2.70, $p < 0.001$ ) | 1.56 (1.19-2.05, $p = 0.001$ ) | 1.58 (1.21-2.08, $p = 0.001$ ) |
| Albuminuria status          | 1                   | 589 (11.2)   | -                              | -                              | -                              |
|                             | 2                   | 2392 (45.5)  | 1.36 (0.87-2.13, $p = 0.179$ ) | 1.37 (0.88-2.15, $p = 0.167$ ) | 1.33 (0.86-2.07, $p = 0.200$ ) |
|                             | 3                   | 2280 (43.3)  | 3.29 (2.15-5.04, $p < 0.001$ ) | 2.95 (1.92-4.53, $p < 0.001$ ) | 2.81 (1.84-4.30, $p < 0.001$ ) |
| SBP (mmHg)                  | Mean (SD)           | 123.3 (15.6) | 1.02 (1.01-1.03, $p < 0.001$ ) | 1.01 (1.01-1.02, $p < 0.001$ ) | 1.01 (1.01-1.02, $p < 0.001$ ) |
| HbA1c (mmol/mol)            | Mean (SD)           | 74.6 (25.4)  | 1.01 (1.01-1.02, $p < 0.001$ ) | 1.02 (1.01-1.02, $p < 0.001$ ) | 1.02 (1.01-1.02, $p < 0.001$ ) |

Abbreviations eGFR- estimated glomerular filtration rate, SBP- systolic blood pressure.

Figure S1.Cumulative hazard for the secondary endpoint of  $\geq 40\%$  drop in eGFR from baseline with a final eGFR  $<30\text{ml/min}$  stratified by ethnicity (african-caribbean vs non-african-caribbean)

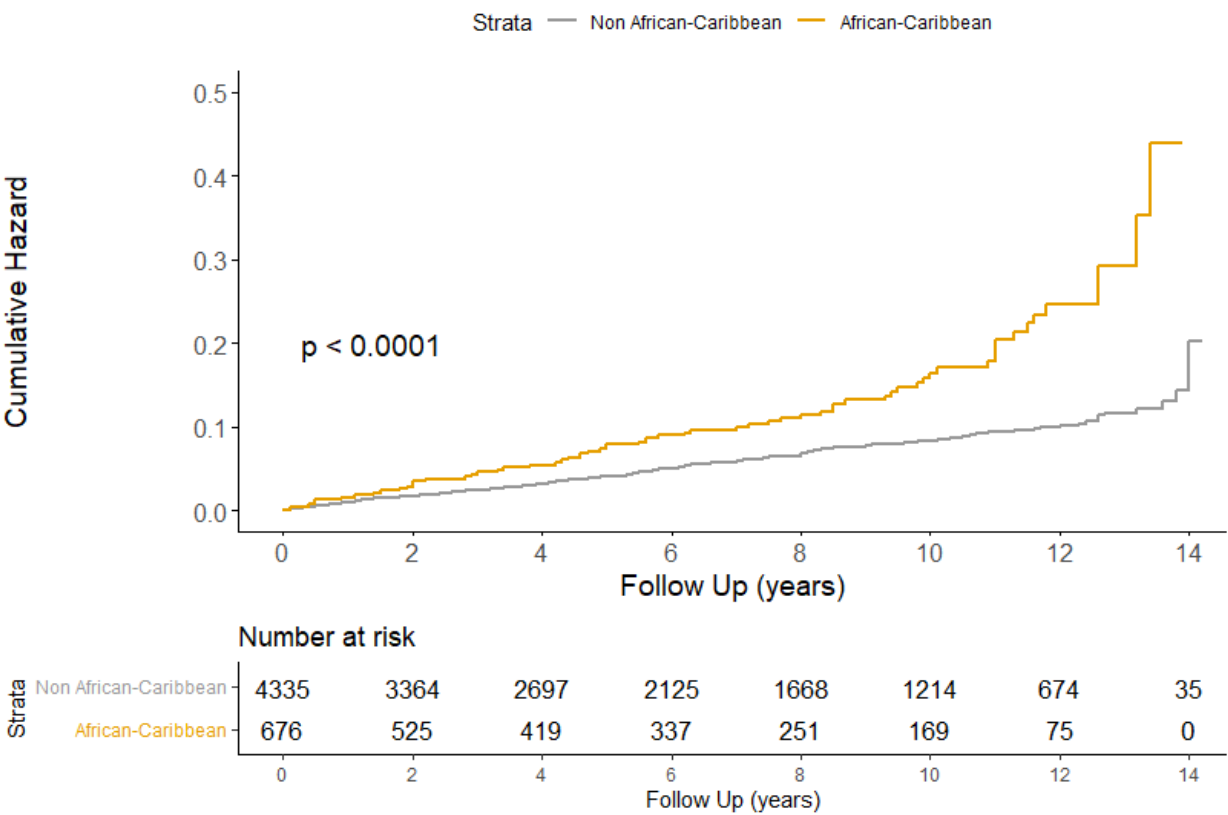



Figure S2. Forest plot presentation of the multivariable Cox regression analysis for the prediction of the secondary endpoint of  $\geq 40\%$  eGFR drop with a final eGFR of  $<30$  ml/min.

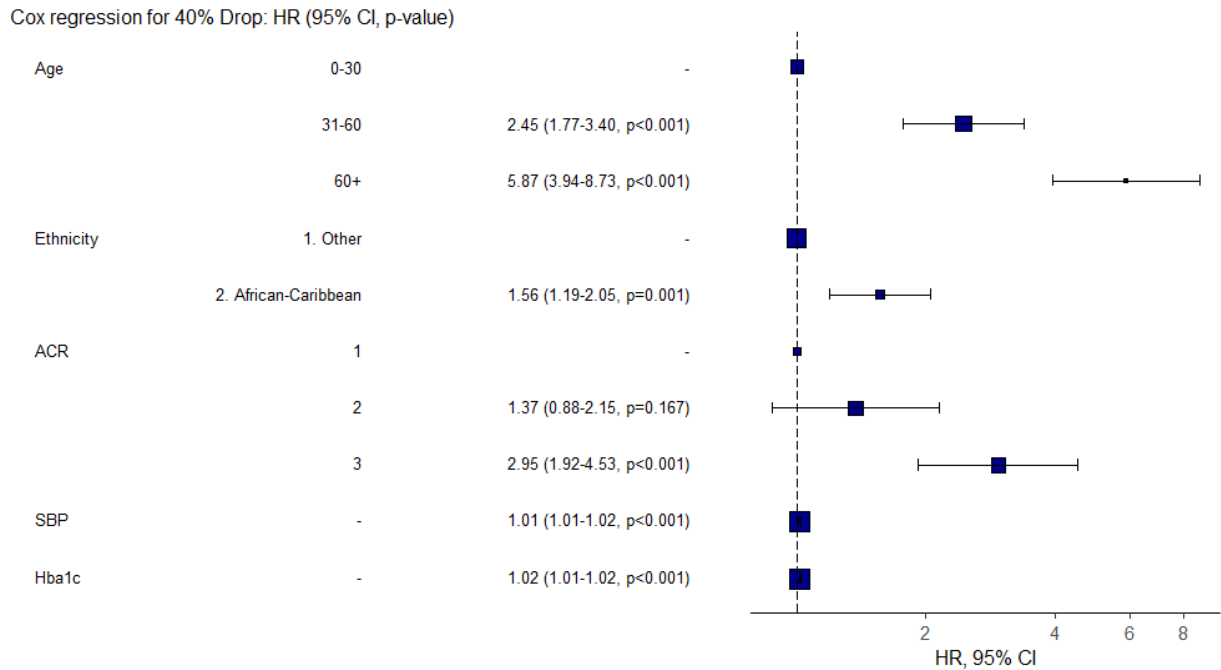

Abbreviations SBP- systolic blood pressure, ACR- urine albumin creatinine ratio.

**Table S5**

**Results of univariate, multivariate Cox regression models and competing risk analysis (with death as a competing event) for secondary endpoint of  $\geq 30\%$  fall from baseline eGFR with final eGFR  $< 30$  ml/min**

| Dependent: Survival           |                     | all          | HR (CPH univariable)         | HR (CPH multivariable)       | HR (Competing risks model)   |
|-------------------------------|---------------------|--------------|------------------------------|------------------------------|------------------------------|
| Age_groups (years)            | 0-30                | 1958 (37.2)  | -                            | -                            | -                            |
|                               | 31-60               | 2885 (54.9)  | 1.98 (1.45-2.72, $p<0.001$ ) | 2.46 (1.78-3.41, $p<0.001$ ) | 2.41 (1.74-3.35, $p<0.001$ ) |
|                               | 60+                 | 416 (7.9)    | 5.15 (3.59-7.39, $p<0.001$ ) | 6.03 (4.06-8.95, $p<0.001$ ) | 5.40 (3.59-8.12, $p<0.001$ ) |
| African - Caribbean_Ethnicity | 1-other             | 4555 (86.6)  | -                            | -                            | -                            |
|                               | 2-african-caribbean | 704 (13.4)   | 2.13 (1.65-2.77, $p<0.001$ ) | 1.61 (1.23-2.11, $p=0.001$ ) | 1.63 (1.24-2.14, $p<0.001$ ) |
| Albuminuria status            | 1                   | 589 (11.2)   | -                            | -                            | -                            |
|                               | 2                   | 2392 (45.5)  | 1.39 (0.89-2.17, $p=0.153$ ) | 1.40 (0.89-2.19, $p=0.141$ ) | 1.36 (0.87-2.11, $p=0.170$ ) |
|                               | 3                   | 2278 (43.3)  | 3.31 (2.16-5.07, $p<0.001$ ) | 2.97 (1.93-4.55, $p<0.001$ ) | 2.83 (1.85-4.33, $p<0.001$ ) |
| SBP (mmHg)                    | Mean (SD)           | 123.3 (15.6) | 1.02 (1.01-1.03, $p<0.001$ ) | 1.01 (1.01-1.02, $p<0.001$ ) | 1.01 (1.01-1.02, $p<0.001$ ) |
| HbA1c (mmol/mol)              | Mean (SD)           | 74.6 (25.4)  | 1.01 (1.01-1.02, $p<0.001$ ) | 1.02 (1.01-1.02, $p<0.001$ ) | 1.02 (1.01-1.02, $p<0.001$ ) |

Abbreviations eGFR- estimated glomerular filtration rate, SBP- systolic blood pressure.

Figure S3. Cumulative hazard for the secondary endpoint of  $\geq 30\%$  drop in eGFR from baseline with a final eGFR  $< 30\text{ml/min}$  stratified by ethnicity (african-caribbean vs non-african-caribbean)

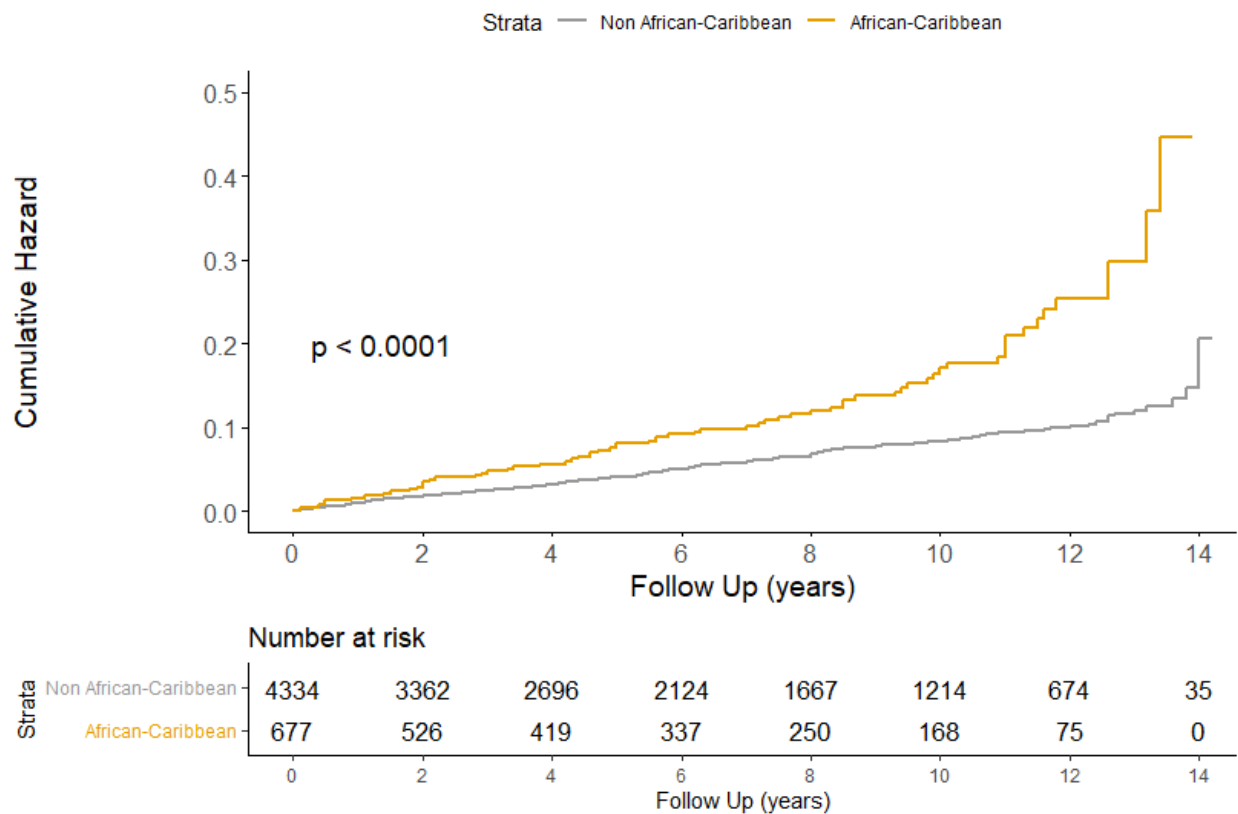

Figure S4. Forest plot presentation of the multivariable Cox regression analysis for the prediction of the secondary endpoint of  $\geq 30\%$  eGFR drop with a final eGFR of  $<30$  ml/min.

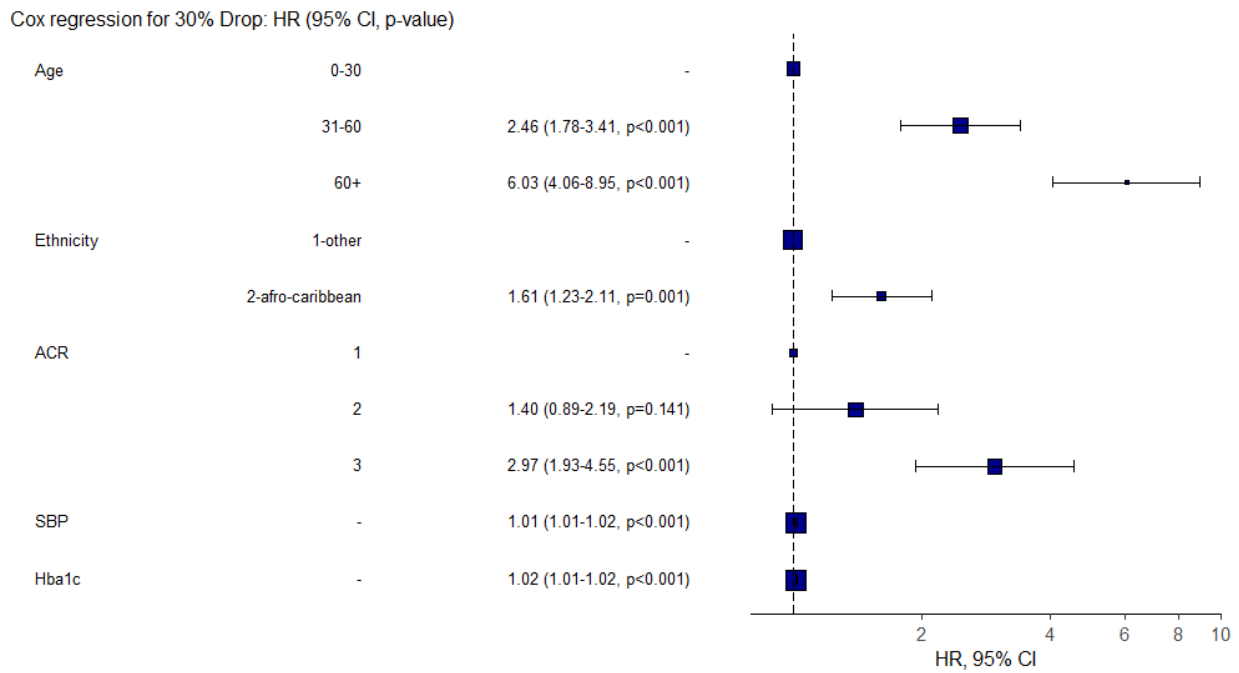

Abbreviations SBP- systolic blood pressure, ACR- urine albumin creatinine ratio.

## Ethnicity unadjusted eGFR summary of key analyses

### Tables S6 to S11

Primary end point

**Table S6 Results of univariate, multivariate Cox regression models and competing risk analysis (with death as a competing event for primary endpoint of  $\geq 50\%$  fall from baseline eGFR with final eGFR  $< 30$  ml/min**

| Dependent: Survival         |                   | all          | HR (CPH univariable)           | HR (CPH multivariable)         | HR (Competing risks model)     |
|-----------------------------|-------------------|--------------|--------------------------------|--------------------------------|--------------------------------|
| Age_groups (years)          | 0-30              | 1958 (37.2)  | -                              | -                              | -                              |
|                             | 31-60             | 2886 (54.9)  | 1.83 (1.33-2.51, $p < 0.001$ ) | 2.33 (1.68-3.24, $p < 0.001$ ) | 2.28 (1.64-3.18, $p < 0.001$ ) |
|                             | 60+               | 417 (7.9)    | 4.49 (3.10-6.50, $p < 0.001$ ) | 5.56 (3.71-8.34, $p < 0.001$ ) | 4.96 (3.26-7.55, $p < 0.001$ ) |
| African-Caribbean_Ethnicity | other             | 4557 (86.6)  | -                              | -                              | -                              |
|                             | african-caribbean | 704 (13.4)   | 2.13 (1.63-2.78, $p < 0.001$ ) | 1.57 (1.19-2.08, $p = 0.001$ ) | 1.60 (1.21-2.11, $p = 0.001$ ) |
| SBP_(mmHg)                  | Mean (SD)         | 123.3 (15.6) | 1.02 (1.01-1.03, $p < 0.001$ ) | 1.01 (1.01-1.02, $p < 0.001$ ) | 1.01 (1.01-1.02, $p = 0.001$ ) |
| HbA1c (mmol/mol)            | Mean (SD)         | 74.6 (25.4)  | 1.02 (1.01-1.02, $p < 0.001$ ) | 1.02 (1.01-1.02, $p < 0.001$ ) | 1.02 (1.01-1.02, $p < 0.001$ ) |
| Albuminuria status          | A1                | 589 (11.2)   | -                              | -                              | -                              |
|                             | A2                | 2392 (45.5)  | 1.31 (0.83-2.08, $p = 0.249$ ) | 1.31 (0.83-2.08, $p = 0.245$ ) | 1.27 (0.81-2.01, $p = 0.300$ ) |
|                             | A3                | 2280 (43.3)  | 3.31 (2.14-5.12, $p < 0.001$ ) | 2.92 (1.89-4.53, $p < 0.001$ ) | 2.78 (1.80-4.31, $p < 0.001$ ) |

Abbreviations eGFR- estimated glomerular filtration rate, SBP- systolic blood pressure.

**Table S7 Results of univariate, multivariate Cox regression models and competing risk analysis (with death as a competing event for secondary endpoint of  $\geq 40\%$  fall from baseline eGFR with final eGFR  $< 30$  ml/min**

| Dependent: Survival         |                     | all          | HR (CPH univariable)         | HR (CPH multivariable)       | HR (Competing risks model)   |
|-----------------------------|---------------------|--------------|------------------------------|------------------------------|------------------------------|
| Age_groups (years)          | 0-30                | 1958 (37.2)  | -                            | -                            | -                            |
|                             | 31-60               | 2886 (54.9)  | 1.97 (1.44-2.71, $p<0.001$ ) | 2.45 (1.77-3.40, $p<0.001$ ) | 2.40 (1.73-3.33, $p<0.001$ ) |
|                             | 60+                 | 417 (7.9)    | 5.00 (3.48-7.19, $p<0.001$ ) | 5.87 (3.94-8.73, $p<0.001$ ) | 5.25 (3.49-7.91, $p<0.001$ ) |
| African-Caribbean_Ethnicity | 1-other             | 4557 (86.6)  | -                            | -                            | -                            |
|                             | 2-african-caribbean | 704 (13.4)   | 2.08 (1.60-2.70, $p<0.001$ ) | 1.56 (1.19-2.05, $p=0.001$ ) | 1.58 (1.21-2.08, $p=0.001$ ) |
| Albuminuria status          | 1                   | 589 (11.2)   | -                            | -                            | -                            |
|                             | 2                   | 2392 (45.5)  | 1.36 (0.87-2.13, $p=0.179$ ) | 1.37 (0.88-2.15, $p=0.167$ ) | 1.33 (0.86-2.07, $p=0.200$ ) |
|                             | 3                   | 2280 (43.3)  | 3.29 (2.15-5.04, $p<0.001$ ) | 2.95 (1.92-4.53, $p<0.001$ ) | 2.81 (1.84-4.30, $p<0.001$ ) |
| SBP (mmHg)                  | Mean (SD)           | 123.3 (15.6) | 1.02 (1.01-1.03, $p<0.001$ ) | 1.01 (1.01-1.02, $p<0.001$ ) | 1.01 (1.01-1.02, $p<0.001$ ) |
| HbA1c (mmol/mol)            | Mean (SD)           | 74.6 (25.4)  | 1.01 (1.01-1.02, $p<0.001$ ) | 1.02 (1.01-1.02, $p<0.001$ ) | 1.02 (1.01-1.02, $p<0.001$ ) |

Abbreviations eGFR- estimated glomerular filtration rate, SBP- systolic blood pressure.

**Table S8 Results of univariate, multivariate Cox regression models and competing risk analysis (with death as a competing event) for secondary endpoint of  $\geq 30\%$  fall from baseline eGFR with final eGFR  $< 30$  ml/min**

| Dependent: Survival         |                     | all          | HR (CPH univariable)         | HR (CPH multivariable)       | HR (Competing risks model)   |
|-----------------------------|---------------------|--------------|------------------------------|------------------------------|------------------------------|
| Age_groups (years)          | 0-30                | 1958 (37.2)  | -                            | -                            | -                            |
|                             | 31-60               | 2885 (54.9)  | 1.98 (1.45-2.72, $p<0.001$ ) | 2.46 (1.78-3.41, $p<0.001$ ) | 2.41 (1.74-3.35, $p<0.001$ ) |
|                             | 60+                 | 416 (7.9)    | 5.15 (3.59-7.39, $p<0.001$ ) | 6.03 (4.06-8.95, $p<0.001$ ) | 5.40 (3.59-8.12, $p<0.001$ ) |
| African-caribbean_Ethnicity | 1-other             | 4555 (86.6)  | -                            | -                            | -                            |
|                             | 2-african-caribbean | 704 (13.4)   | 2.13 (1.65-2.77, $p<0.001$ ) | 1.61 (1.23-2.11, $p=0.001$ ) | 1.63 (1.24-2.14, $p<0.001$ ) |
| Albuminuria status          | 1                   | 589 (11.2)   | -                            | -                            | -                            |
|                             | 2                   | 2392 (45.5)  | 1.39 (0.89-2.17, $p=0.153$ ) | 1.40 (0.89-2.19, $p=0.141$ ) | 1.36 (0.87-2.11, $p=0.170$ ) |
|                             | 3                   | 2278 (43.3)  | 3.31 (2.16-5.07, $p<0.001$ ) | 2.97 (1.93-4.55, $p<0.001$ ) | 2.83 (1.85-4.33, $p<0.001$ ) |
| SBP (mmHg)                  | Mean (SD)           | 123.3 (15.6) | 1.02 (1.01-1.03, $p<0.001$ ) | 1.01 (1.01-1.02, $p<0.001$ ) | 1.01 (1.01-1.02, $p<0.001$ ) |
| HbA1c (mmol/mol)            | Mean (SD)           | 74.6 (25.4)  | 1.01 (1.01-1.02, $p<0.001$ ) | 1.02 (1.01-1.02, $p<0.001$ ) | 1.02 (1.01-1.02, $p<0.001$ ) |

**Table S9 Baseline characteristics of 5261 people with type 1 diabetes without ethnicity adjustment for eGFR**

|                                     |                      |
|-------------------------------------|----------------------|
|                                     | Overall (N=5261)     |
| <b>Age (years)</b>                  | 34.0 (26.0, 46.0)    |
| <b>Duration of diabetes (years)</b> | 11.0 (2.0, 22.0)     |
| <b>Gender(%)</b>                    |                      |
| FEMALE                              | 2665 (50.7%)         |
| MALE                                | 2596 (49.3%)         |
| <b>Ethnicity(%)</b>                 |                      |
| African -Caribbean                  | 704 (13.4%)          |
| Asian                               | 155 (2.9%)           |
| Caucasian                           | 4091 (77.8%)         |
| Other                               | 311 (5.9%)           |
| <b>Retinopathy(%)</b>               |                      |
| R0                                  | 3143 (87.0%)         |
| R1-R2-R3/M1                         | 471 (13.0%)          |
| <b>Weight (kg)</b>                  | 71.3 (61.9, 82.3)    |
| <b>BMI(kg/m<sup>2</sup>)</b>        |                      |
| <b>ACR (mg/mmol)</b>                | 16.8 (5.6, 44.0)     |
| <b>Albuminuria status</b>           |                      |
| A1                                  | 589 (11.2%)          |
| A2                                  | 2392 (45.5%)         |
| A3                                  | 2280 (43.3%)         |
| <b>eGFR (ml/min)</b>                | 88.9 (70.8, 109.4)   |
| <b>SBP(mmHg)</b>                    | 122.0 (113.0, 132.0) |
| <b>DBP (mmHg)</b>                   | 74.0 (68.0, 80.0)    |



|                                 |                   |
|---------------------------------|-------------------|
| <b>HbA1c (mmol/mol)</b>         | 68.3 (57.0, 86.9) |
| <b>Cholesterol (mmol/l)</b>     | 4.6 (4.0, 5.2)    |
| <b>HDLcholesterol (mmol/l)</b>  | 1.5 (1.3, 1.9)    |
| <b>LDL-cholesterol (mmol/l)</b> | 2.4 (1.9, 3.0)    |
| <b>Triglycerides (mmol/l)</b>   | 1.0 (0.7, 1.5)    |

Data median interquartile range shown Abbreviations eGFR- estimated glomerular filtration rate, SBP- systolic blood pressure, DBP- diastolic blood pressure, BMI- body mass index, HDL- high density lipoprotein, LDL- low density lipoprotein, ACR- urine albumin creatinine ratio.

**Table S10 : Comparison of baseline characteristics between people of African-Caribbean origin and those of non-African Caribbean origin (without ethnicity adjustment for eGFR)**

|                                     | other (N=4557)       | African-caribbean (N=704) | p value |
|-------------------------------------|----------------------|---------------------------|---------|
| <b>Age (years)</b>                  | 35.0 (26.0, 46.0)    | 32.0 (20.0, 44.0)         | < 0.001 |
| <b>Duration of diabetes (years)</b> | 12.0 (3.0, 23.0)     | 6.0 (1.0, 14.5)           | < 0.001 |
| <b>Gender(%)</b>                    |                      |                           | 0.185   |
| FEMALE                              | 2292 (50.3%)         | 373 (53.0%)               |         |
| MALE                                | 2265 (49.7%)         | 331 (47.0%)               |         |
| <b>Ethnicity(%)</b>                 |                      |                           | < 0.001 |
| African-Caribbean                   | 0 (0.0%)             | 704 (100.0%)              |         |
| Asian                               | 155 (3.4%)           | 0 (0.0%)                  |         |
| Caucasian                           | 4091 (89.8%)         | 0 (0.0%)                  |         |
| Other                               | 311 (6.8%)           | 0 (0.0%)                  |         |
| <b>Retinopathy(%)</b>               |                      |                           | < 0.001 |
| R0                                  | 2739 (87.9%)         | 404 (81.3%)               |         |
| R1-R2-R3                            | 378 (12.1%)          | 93 (18.7%)                |         |
| <b>Weight (kg)</b>                  | 71.6 (62.2, 82.4)    | 68.8 (58.4, 81.4)         | < 0.001 |
| <b>BMI(kg/m<sup>2</sup>)</b>        | 24.4 (22.0, 27.4)    | 24.0 (21.0, 28.0)         | 0.384   |
| <b>ACR (mg/mmol)</b>                | 14.3 (5.5, 43.0)     | 39.0 (8.2, 45.0)          | < 0.001 |
| <b>Albuminuria status</b>           |                      |                           | < 0.001 |
| A1                                  | 532 (11.7%)          | 57 (8.1%)                 |         |
| A2                                  | 2151 (47.2%)         | 241 (34.2%)               |         |
| A3                                  | 1874 (41.1%)         | 406 (57.7%)               |         |
| <b>eGFR (ml/min)</b>                | 91.2 (73.4, 111.1)   | 72.1 (55.0, 94.1)         | < 0.001 |
| <b>SBP(mmHg)</b>                    | 122.0 (113.0, 132.0) | 122.0 (112.0, 133.0)      | 0.840   |

|                                |                   |                    |         |
|--------------------------------|-------------------|--------------------|---------|
| <b>DBP(mmHg)</b>               | 74.0 (68.0, 80.0) | 74.0 (67.0, 80.0)  | 0.653   |
| <b>Hba1c (mmol/mol)</b>        | 67.2 (56.3, 83.0) | 83.0 (65.0, 106.1) | < 0.001 |
| <b>Cholesterol (mmol/l)</b>    | 4.6 (4.0, 5.2)    | 4.5 (3.9, 5.2)     | 0.313   |
| <b>HDLcholesterol (mmol/l)</b> | 1.6 (1.3, 1.9)    | 1.5 (1.2, 1.8)     | 0.081   |
| <b>LDLcholesterol (mmol/l)</b> | 2.4 (1.9, 3.0)    | 2.5 (2.0, 3.0)     | 0.026   |
| <b>Triglycerides (mmol/l)</b>  | 1.0 (0.7, 1.5)    | 0.9 (0.7, 1.5)     | 0.014   |

Data median interquartile range shown Abbreviations eGFR- estimated glomerular filtration rate, SBP- systolic blood pressure, DBP- diastolic blood pressure, BMI- body mass index, HDL- high density lipoprotein, LDL- low density lipoprotein , ACR- urine albumin creatinine ratio.

**Table S11 Comparison of baseline characteristics of people with an eGFR fall  $\geq$  50% from baseline with final eGFR  $<30$  ml/min with those whose eGFR fell less than 50% from baseline (without ethnicity adjustment for eGFR)**

|                                     | 50% drop (N=263)     | less than 50% (N=4998) | p value   |
|-------------------------------------|----------------------|------------------------|-----------|
| <b>Age (years)</b>                  | 42.0 (32.0, 55.5)    | 34.0 (26.0, 45.0)      | $< 0.001$ |
| <b>Duration of diabetes (years)</b> | 14.0 (4.0, 27.0)     | 11.0 (2.0, 21.0)       | $< 0.001$ |
| <b>Gender(%)</b>                    |                      |                        | 0.822     |
| FEMALE                              | 135 (51.3%)          | 2530 (50.6%)           |           |
| MALE                                | 128 (48.7%)          | 2468 (49.4%)           |           |
| <b>Ethnicity(%)</b>                 |                      |                        | $< 0.001$ |
| African-Caribbean                   | 62 (23.6%)           | 642 (12.8%)            |           |
| Asian                               | 8 (3.0%)             | 147 (2.9%)             |           |
| Caucasian                           | 181 (68.8%)          | 3910 (78.2%)           |           |
| Other                               | 12 (4.6%)            | 299 (6.0%)             |           |
| <b>Retinopathy (%)</b>              |                      |                        | $< 0.001$ |
| R0-R1/M0                            | 110 (72.8%)          | 3033 (87.6%)           |           |
| R1-R2-R3/M1                         | 41 (27.2%)           | 430 (12.4%)            |           |
| <b>Weight (kg)</b>                  | 69.4 (59.8, 82.0)    | 71.4 (62.0, 82.3)      | 0.881     |
| <b>BMI(kg/m<sup>2</sup>)</b>        | 25.0 (22.0, 28.6)    | 24.4 (22.0, 27.4)      | 0.029     |
| <b>ACR (mg/mmol)</b>                | 39.0 (10.3, 45.0)    | 15.6 (5.6, 43.5)       | $< 0.001$ |
| <b>Albuminuria status</b>           |                      |                        | $< 0.001$ |
| A1                                  | 22 (8.4%)            | 567 (11.3%)            |           |
| A2                                  | 80 (30.4%)           | 2312 (46.3%)           |           |
| A3                                  | 161 (61.2%)          | 2119 (42.4%)           |           |
| <b>eGFR(ml/min)</b>                 | 69.8 (58.0, 85.7)    | 90.2 (71.8, 110.2)     | $< 0.001$ |
| <b>SBP(mmHg)</b>                    | 126.0 (116.0, 138.0) | 122.0 (112.0, 132.0)   | $< 0.001$ |

|                                 |                    |                   |         |
|---------------------------------|--------------------|-------------------|---------|
| <b>DBP(mmHg)</b>                | 75.0 (68.0, 81.0)  | 74.0 (68.0, 80.0) | 0.213   |
| <b>Hba1c(mmol/mol)</b>          | 80.3 (61.7, 103.6) | 68.0 (57.0, 85.8) | < 0.001 |
| <b>Cholesterol (mmol/l)</b>     | 4.5 (3.8, 5.3)     | 4.6 (4.0, 5.2)    | 0.611   |
| <b>HDLcholesterol (mmol/l)</b>  | 1.5 (1.2, 1.8)     | 1.5 (1.3, 1.9)    | 0.101   |
| <b>LDL cholesterol (mmol/l)</b> | 2.3 (1.8, 2.9)     | 2.4 (1.9, 3.0)    | 0.023   |
| <b>Triglycerides (mmol/l)</b>   | 1.3 (0.8, 2.0)     | 1.0 (0.7, 1.5)    | < 0.001 |

Data median interquartile range shown Abbreviations eGFR- estimated glomerular filtration rate, SBP- systolic blood pressure, DBP- diastolic blood pressure, BMI- body mass index, HDL- high density lipoprotein, LDL- low density lipoprotein, ACR- urine albumin creatinine ratio.
